# Supplementary material
Source: PubMed Central journal article supplement (PMC4365066)
Supplement: 14_007_He.Suppl.pdf [file 14_007_He.Suppl.pdf]

Supplemental Data

Enhanced Hypoxia-Inducible Factor (HIF)-1 $\alpha$  Stability Induced by 5-Hydroxymethyl-2-Furfural (5-HMF) Contributes to Protection against Hypoxia

Yun-Ling He,<sup>1\*</sup> Ming-Ming Li,<sup>1,2\*</sup> Li-Ying Wu,<sup>1</sup> Tong Zhao,<sup>1</sup> Yao Di,<sup>1</sup> Xin Huang,<sup>1</sup> Xue-Feng Ding,<sup>1</sup> Kui-Wu Wu,<sup>1</sup> Ming Fan,<sup>1,2</sup> and Ling-Ling Zhu<sup>1</sup>

Online address: <http://www.molmed.org>

The Feinstein Institute for Medical Research North Shore LIJ  
Empowering Imagination. Pioneering Discovery.\*

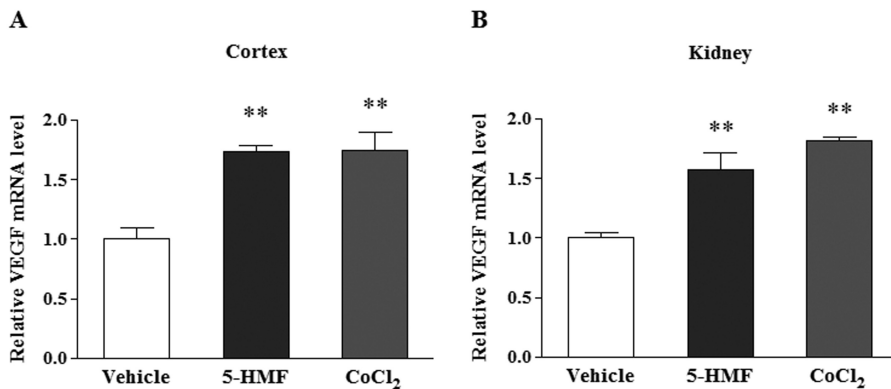

**Supplementary Figure S1.** Effects of 5-HMF on VEGF mRNA in C57BL/6J mice. (A) and (B) The VEGF mRNA expression in the cortex and in the kidney. The VEGF mRNA levels were examined by real time PCR. The data are representative of three different experiments and are expressed as the means  $\pm$  SE. \*\* $p < 0.01$ , compared with the vehicle.

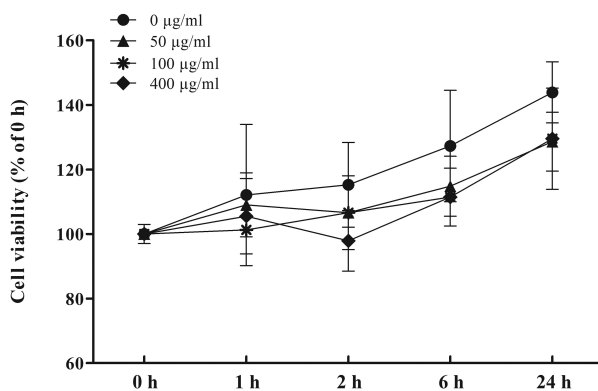

**Supplementary Figure S2.** Cell proliferation during 24 h treated with different concentrations of 5-HMF. PC12 cells were exposed to 50, 100, 400  $\mu$ g of 5-HMF for 1 h, 2 h, 6 h, and 24 h. At the indicated time points cells were collected to test cell viability by MTT assay. Values are the means  $\pm$  SE of three independent experiments.

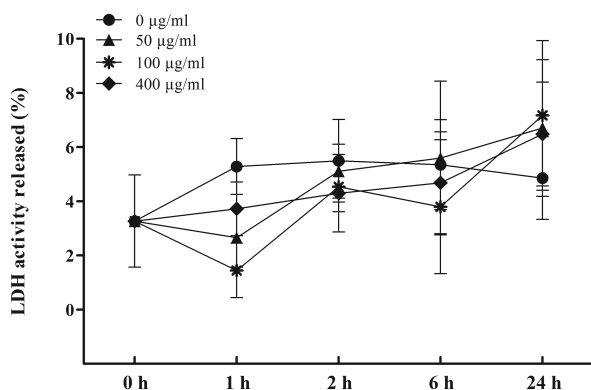

**Supplementary Figure S3.** Cell toxicity during 24 h treated with different concentrations of 5-HMF. PC12 cells were exposed to 50, 100, 400  $\mu\text{g}$  of 5-HMF for 1 h, 2 h, 6 h, and 24 h. At the indicated time points cells were collected to test cell viability by LDH cytotoxicity assay. Values are the means  $\pm$  SE of three independent experiments.

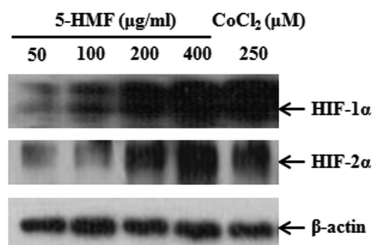

**Supplementary Figure S4.** Expressions of HIF-1 $\alpha$  and HIF-2 $\alpha$  in a dose dependent after cells were treated with different concentrations of 5-HMF. PC12 cells were exposed to 50, 100, 200, 400  $\mu\text{g}$  of 5-HMF or 250  $\mu\text{M}$  CoCl<sub>2</sub> (as a positive control) for 1 h, followed by detection with western blot.  $\beta$ -actin was used as an internal loading control.

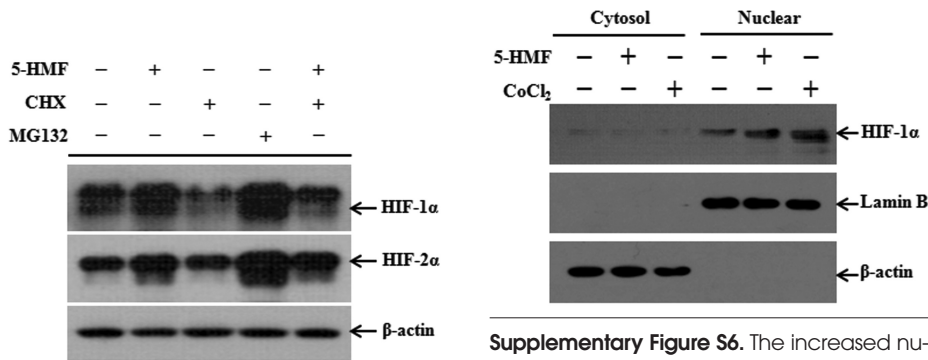

**Supplementary Figure S6.** The increased nuclear translocation of HIF-1 $\alpha$  by 5-HMF in PC12 cells. PC12 cells were exposed to 5-HMF or CoCl<sub>2</sub> for 1 h. After that, cytoplasm and nucleus were separately collected and analyzed with western blot. Lamin B was used as an internal loading control for nucleus, and  $\beta$ -actin was used as an internal loading control for cytoplasm.

**Supplementary Figure S5.** The increased stability of HIF-1 $\alpha$  and HIF-2 $\alpha$  by 5-HMF. After PC12 cells were treated with CHX (100  $\mu\text{M}$ ), 5-HMF (100  $\mu\text{g/ml}$ ) or MG132 (10  $\mu\text{M}$ ), western blot was used to detect the expressions of HIF-1 $\alpha$  and HIF-2 $\alpha$ .  $\beta$ -actin was used as an internal loading control.
